# Supplementary material for: Damage- and pathogen-associated molecular patterns play differential roles in late mortality after critical illness
Source: JCI journal article supplement (doi:10.1172/jci.insight.127925), 2019-08-21
Supplement: sd1 [file 1]

## Supplementary Figure 1.

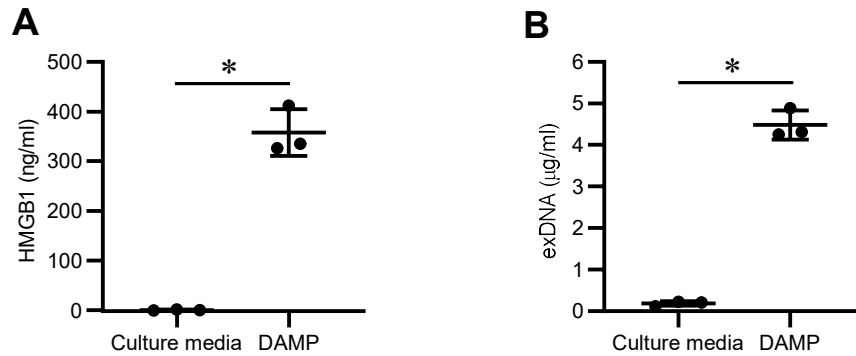

**Supplementary Figure 1. Sonicated cells release diverse DAMPs.** Necrotic fibroblast supernatants (DAMPs) generated by sonication were used as innate immune stimuli. (A) HMGB1 and (B) exDNA, in the necrotic fibroblast supernatants were measured to determine DAMP contents.

## Supplementary Figure 2.

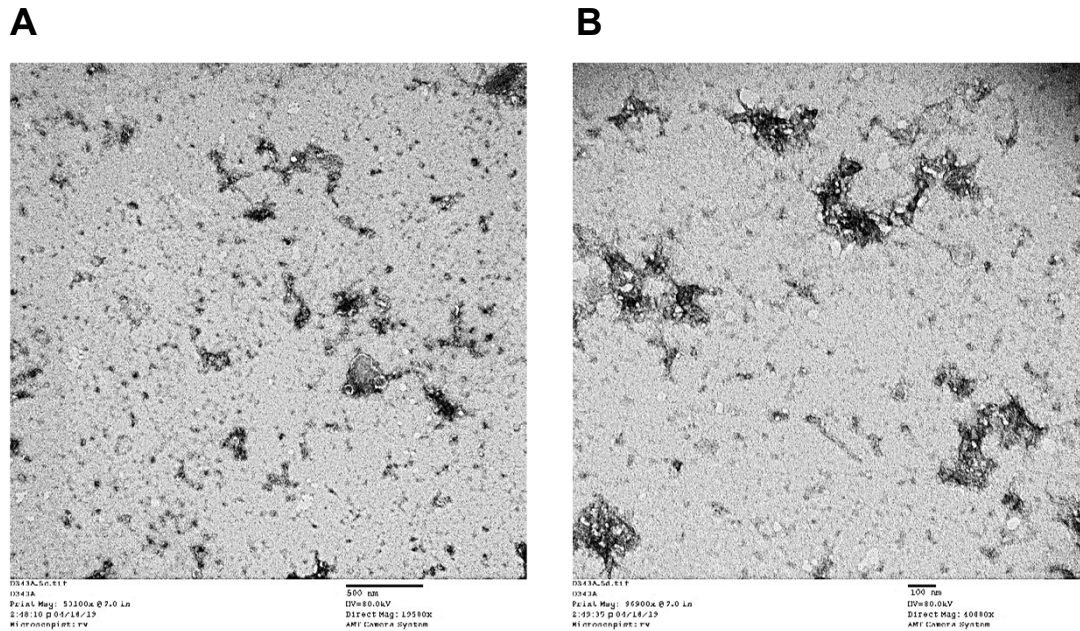

**Supplementary Figure 2. Electron microscopy of Supernatants of sonicated fibroblasts.** Supernatants of sonicated fibroblasts were attached to carbon-coated copper grids for 3 min, washed two times with distilled water, and briefly stained with 1% uranyl acetate before viewing on a Phillips CM12 transmission electron microscope at 80 kV. (A) 19,500x, bar indicates 500 nm. (B) 40,000x, bar indicates 100 nm.

### Supplementary Figure 3.

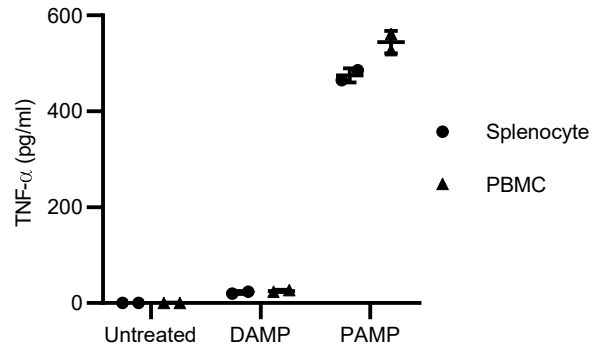

**Supplementary Figure 3. Comparison between primary innate immune cell stimulation by DAMPs and PAMPs .** Mouse splenocytes and peripheral blood mononuclear cells (PBMCs) ( $4 \times 10^5$ /well) were stimulated overnight with either necrotic fibroblast supernatants (DAMPs, 100  $\mu$ g/ml) or necrotic gram-negative bacteria supernatants (PAMPs, 5  $\mu$ g/ml) generated by sonication in a 96-well plate. The amount of TNF- $\alpha$  released from the cells was measured using ELISA.

### Supplementary Figure 4.

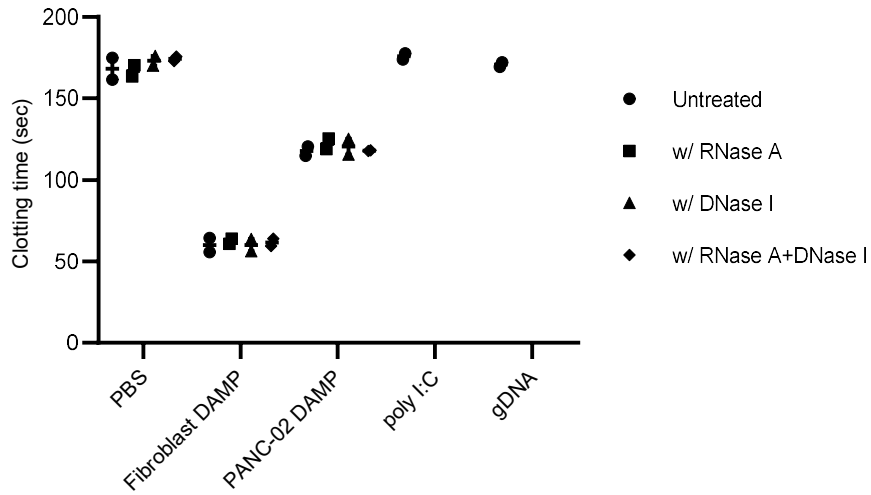

**Supplementary Figure 4. DAMPs activate plasma coagulation in a nucleic acid-independent manner.** Supernatants of sonicated normal fibroblasts and PANC-02 pancreatic cancer cells were used as DAMPs. These DAMPs were pretreated with RNase A (100  $\mu\text{g/ml}$ ), DNase I (2,000 units/ml), or combination. Untreated and treated DAMPs (5  $\mu\text{g}$ ) were incubated with 50  $\mu\text{l}$  normal mouse plasma. Clotting time of the plasma was determined using a coagulometer. PBS and silica were used as negative and positive coagulation activation controls. Naked long double-stranded RNAs (polyI:C) and calf thymus genomic DNAs (gDNAs) were treated to determined pro-coagulation activity of polyanionic nucleic acids.  $n = 2$ .

## Supplementary Figure 5.

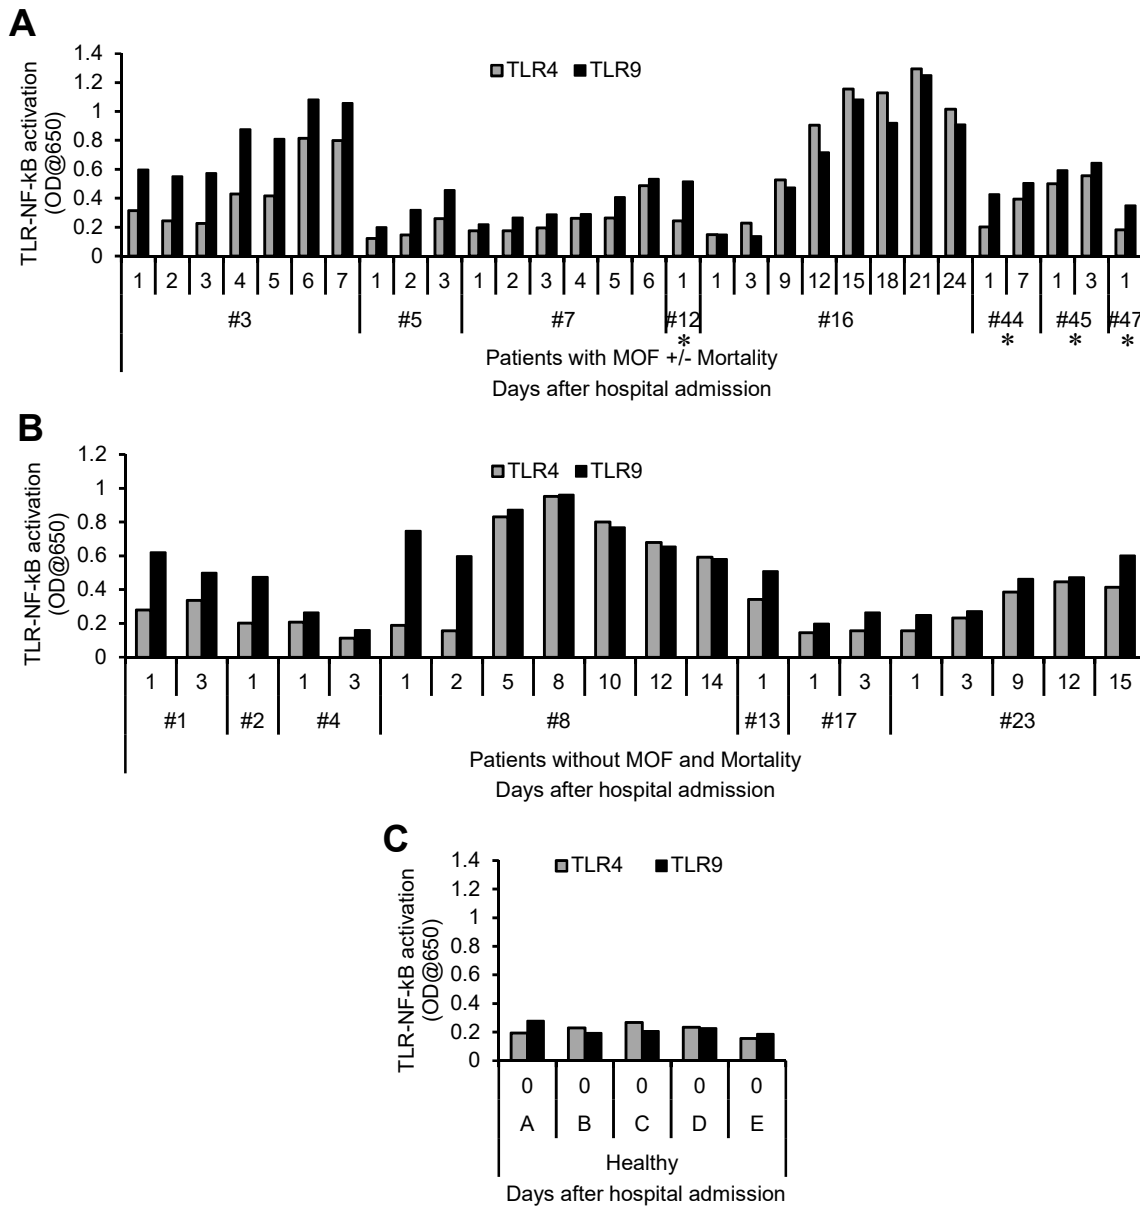

**Supplementary Figure 5. Serum-activated TLRs and NF- $\kappa$ B at various time points after trauma.** TLR reporter cells were incubated overnight with serum isolated at various time points after traumatic injury. (A) Survived or non-survived trauma patients who have late MOF. (B) Trauma patients who have no MOF nor mortality. (C) Healthy persons. \* Samples available only at indicated time points.
